# Supplementary material
Source: publisher figshare collection journal article supplement (https://gsajournals.figshare.com/ndownloader/files/22423683)
Supplement: Supplementary file 1 [file 22423683]

**Table S1. Sequencing data for nine libraries obtained by RNA-seq**

| Sample | Raw data read | Base (G) | Valid data read | Base (G) | Valid ratio (%) | Q20% | Q30% | GC content (%) |
| --- | --- | --- | --- | --- | --- | --- | --- | --- |
| Las_SL1 | 89878518 | 13.48 | 89132950 | 13.37 | 99.17 | 99.89 | 97.89 | 45 |
| Las_SL2 | 117284864 | 17.59 | 87699358 | 13.15 | 74.77 | 99.95 | 98.01 | 45 |
| Las_SL3 | 102634166 | 15.40 | 81245396 | 12.19 | 79.16 | 99.94 | 98.12 | 45 |
| Las_ML1 | 112968498 | 16.95 | 112499652 | 16.87 | 99.58 | 99.56 | 95.11 | 45 |
| Las_ML2 | 128177490 | 19.23 | 98768636 | 14.82 | 77.06 | 99.70 | 95.21 | 45 |
| Las_ML3 | 106174488 | 15.93 | 89441308 | 13.42 | 84.24 | 99.78 | 95.95 | 45 |
| Las_WL1 | 98684292 | 14.80 | 86283614 | 12.94 | 87.43 | 99.93 | 98.73 | 45 |
| Las_WL2 | 127509162 | 19.13 | 86368286 | 12.96 | 67.73 | 99.86 | 97.73 | 46 |
| Las_WL3 | 118757054 | 17.81 | 80185464 | 12.03 | 67.52 | 99.90 | 97.55 | 46 |

Note: Las-SL, intensity light treatment group of lettuce (60±2 μmol·m–2·s–1); Las-ML, medium light treatment group of lettuce (175±2 μmol·m–2·s–1); Las-WL, weak light treatment group of lettuce (340±2 μmol·m–2·s–1). Q20%, Proportion of bases with mass values ≥ 20 (sequencing error rate is less than 0.01); Q30%, Proportion of bases with mass value ≥ 30 (sequencing error rate is less than 0.001).
